# Supplementary material for: Diagnostic accuracy of the response to the brief tachycardia provoked by standing in children suspected for long QT syndrome
Source: PubMed Central journal article supplement (PMC8183857; doi:10.1016/j.hroo.2021.03.005), 2021-03-13
Supplement: mmc1.pdf [file mmc1.pdf]

**Supplementary material**

**Supplementary Tables**

|                                       | Control<br>n=86 | LQTS<br>n=47 | Possible LQTS<br>n=15 | Other<br>n=11 | p-value          |
|---------------------------------------|-----------------|--------------|-----------------------|---------------|------------------|
| <b>Age, years</b>                     | 10 (7-14)       | 12 (8-15)    | 13 (10-15)            | 13 (12-15)    | 0.085            |
| <b>Girls</b>                          | 39 (45%)        | 29 (62%)     | 11 (73%)              | 2 (18%)       | 0.012            |
| <b>Presentation</b>                   |                 |              |                       |               | <b>&lt;0.001</b> |
| Family screening                      | 47 (55%)        | 38 (81%)     | 3 (20%)               | 1 (9%)        |                  |
| Family SCD                            | 8 (9%)          | 0 (0%)       | 1 (7%)                | 2 (18%)       |                  |
| Near-drowning/OHCA/ACA                | 1 (1%)          | 0 (0%)       | 2 (13%)               | 3 (27%)       |                  |
| Other                                 | 30 (35%)        | 9 (19%)      | 9 (60%)               | 5 (45%)       |                  |
| <b>Symptomatic at presentation</b>    | 1 (1%)          | 3 (6%)       | 2 (13%)               | 3 (27%)       | 0.002            |
| <b>BB-therapy</b>                     | 1 (1%)          | 9 (19%)      | 4 (27%)               | 2 (18%)       | <b>&lt;0.001</b> |
| <b>Supine position‡</b>               |                 |              |                       |               |                  |
| HR <sub>baseline</sub> , bpm          | 81 (±15)        | 73 (±16)     | 74 (±17)              | 71 (±13)      | 0.028            |
| QT <sub>baseline</sub> , ms           | 367 (±34)       | 429 (±58)    | 415 (±60)             | 378 (±30)     | <b>&lt;0.001</b> |
| QTc <sub>baseline</sub>               | 421 (±29)       | 466 (±36)    | 452 (±39)             | 410 (±28)     | <b>&lt;0.001</b> |
| <b>Standing position‡</b>             |                 |              |                       |               |                  |
| HR <sub>maxHR</sub> , bpm             | 112 (±15)       | 100 (±17)    | 110 (±19)             | 102 (±14)     | <b>&lt;0.001</b> |
| QT <sub>maxHR</sub> , ms              | 360 (±34)       | 421 (±60)    | 393 (±56)             | 374 (±44)     | <b>&lt;0.001</b> |
| QTc <sub>maxHR</sub> , ms             | 489 (±37)       | 537 (±51)    | 526 (±55)             | 483 (±37)     | <b>&lt;0.001</b> |
| HR <sub>stretch</sub> , bpm           | 110 (±15)       | 99 (±17)     | 109 (±20)             | 99 (±11)      | <b>0.001</b>     |
| QT <sub>stretch</sub> , ms            | 363 (±36)       | 429 (±62)    | 395 (±55)             | 378 (±46)     | <b>&lt;0.001</b> |
| QTc <sub>stretch</sub> , ms           | 489 (±42)       | 544 (±56)    | 527 (±55)             | 483 (±40)     | <b>&lt;0.001</b> |
| QT <sub>return</sub> , ms             | 371 (±39)       | 450 (±74)    | 405 (±61)             | 376 (±26)     | <b>&lt;0.001</b> |
| QTc <sub>return</sub> , ms            | 429 (±38)       | 492 (±60)    | 456 (±70)             | 406 (±35)     | <b>&lt;0.001</b> |
| <b>Response to standing‡</b>          |                 |              |                       |               |                  |
| Time to maximal tachycardia, s        | 11 ( 9-14)      | 11 (10-13)   | 11 ( 8-13)            | 9 ( 7-12)     | 0.222            |
| Time to maximal QT-stretching, s      | 11 ( 9-14)      | 10 ( 9-12)   | 10 ( 8-13)            | 8 ( 7-11)     | 0.293            |
| Time to return to baseline, s         | 21 (18-27)      | 20 (19-29)   | 20 (17-29)            | 21 (17-23)    | 0.902            |
| ΔHR during maximal tachycardia, bpm   | 32 (±11)        | 27 (± 9)     | 36 (± 9)              | 30 (±11)      | 0.008            |
| ΔQT during maximal tachycardia, ms    | -9 (±22)        | -8 (±30)     | -22 (±35)             | -3 (±29)      | 0.269            |
| ΔQTc during maximal tachycardia, ms   | 67 (±41)        | 71 (±47)     | 73 (±47)              | 75 (±49)      | 0.908            |
| ΔHR during maximal QT-stretching, bpm | 31 (±11)        | 26 (± 9)     | 35 (± 9)              | 28 (± 6)      | 0.009            |
| ΔQT during maximal QT-stretching, ms  | -7 (±21)        | 0 (±39)      | -20 (±40)             | 1 (±34)       | 0.145            |
| ΔQTc during maximal QT-stretching, ms | 67 (±43)        | 78 (±54)     | 74 (±53)              | 74 (±51)      | 0.658            |
| ΔQT upon return to baseline HR, ms    | 5 (±28)         | 22 (±47)     | -5 (±58)              | 2 (±23)       | 0.062            |
| ΔQTc upon return to baseline HR, ms   | 8 (±31)         | 26 (±50)     | -1 (±70)              | 5 (±22)       | 0.067            |

**Supplementary Table S1.** Baseline characteristics and manual ECG-measurements. Differences between groups were tested using a  $\chi^2$ -test for categorical variables, and with a one-way ANOVA or Kruskal Wallis test for continuous variables as appropriate. For post-hoc analyses a Bonferroni correction was used in order to correct for multiple comparisons. ‡ p-values <0.002 are considered to be significant.

SCD=Sudden Cardiac Death, OHCA=Out of Hospital Cardiac Arrest, ACA=Aborted Cardiac Arrest, BB=beta-blocker, HR=heart rate, QTc=QT-interval corrected for heart rate using Bazett's formula, bpm=beats per minute, (m)s=(milli)seconds.

|                                  | Inter-reader        |                    | Intra-reader        |                    |
|----------------------------------|---------------------|--------------------|---------------------|--------------------|
|                                  | ICC<br>(95% CI)     | Mean<br>(±95% LoA) | ICC<br>(95% CI)     | Mean<br>(±95% LoA) |
| <b>Supine position</b>           |                     |                    |                     |                    |
| <i>HR<sub>baseline</sub>,bpm</i> | 0.807 (0.378-0.938) | 6 (± 15)           | 0.843 (0.605-0.994) | 3 (±16)            |
| <i>QT<sub>baseline</sub>,ms</i>  | 0.919 (0.779-0.972) | 4 (± 66)           | 0.870 (0.614-0.956) | 17 (±57)           |
| <b>Standing position</b>         |                     |                    |                     |                    |
| <i>HR<sub>maxHR</sub>,bpm</i>    | 0.937 (0.822-0.978) | 0 (± 11)           | 0.904 (0.772-0.968) | 3 (±12)            |
| <i>QT<sub>maxHR</sub>,ms</i>     | 0.939 (0.820-0.979) | 9 (± 40)           | 0.885 (0.683-0.962) | 4 (±58)            |
| <i>HR<sub>stretch</sub>,bpm</i>  | 0.935 (0.813-0.979) | 1 (± 12)           | 0.920 (0.778-0.973) | 2 (±13)            |
| <i>QT<sub>stretch</sub>,ms</i>   | 0.916 (0.757-0.972) | 0 (± 51)           | 0.902 (0.723-0.967) | 4 (±60)            |
| <i>HR<sub>return</sub>,bpm</i>   | 0.832 (0.478-0.945) | 5 (± 15)           | 0.843 (0.597-0.944) | 4 (±16)            |
| <i>QT<sub>return</sub>,ms</i>    | 0.784 (0.464-0.922) | 3 (±121)           | 0.853 (0.618-0.948) | 17 (±78)           |

**Supplementary Table S2.** Inter- and intra-reader validity.

To determine inter- and intra-reader measurement validity, a random sample of 10% was measured by an additional reader (JP) and re-measured by the principal reader (SV). Inter- and intra-reader were expressed as the intra-class correlation coefficient (ICC) for single measurements for continuous variables based on a two-way agreement (inter-reader validity) and consistency (intra-reader validity) model according to Cicchetti<sup>1</sup> and Fleiss<sup>2</sup>. Bland-Altman analyses<sup>3</sup> were then performed to assess bias and 95% limits of agreement (LoA). HR=heart rate, QTc=QT-interval corrected for heart rate using Bazett's formula, bpm=beats per minute, ms=milliseconds, IC=confidence interval.

1. Cicchetti DV, Sparrow SA. Developing criteria for establishing interrater reliability of specific items: applications to assessment of adaptive behavior. American journal of mental deficiency Sep 1981;86:127-137.
2. Fleiss JL. Statistical methods for rates and proportions. New York, N.Y: John Wiley and Sons; 1981.
3. Bland JM, Altman DG. Comparing methods of measurement: why plotting difference against standard method is misleading. Lancet (London, England) Oct 21 1995;346:1085-1087.

|                       | <i>Inter-reader</i> |              | <i>Intra-reader</i> |              |
|-----------------------|---------------------|--------------|---------------------|--------------|
|                       | <i>Agreement</i>    | <i>Kappa</i> | <i>Agreement</i>    | <i>Kappa</i> |
| <b>Baseline</b>       |                     |              |                     |              |
| <i>Lead group I</i>   | 80%                 | 0.21         | 87%                 | 0.61         |
| <i>Lead group II</i>  | 67%                 | 0.53         | 80%                 | 0.68         |
| <i>Lead group III</i> | 87%                 | 0.30         | 93%                 | 0.64         |
| <i>Lead group IV</i>  | 60%                 | 0.22         | 87%                 | 0.75         |
| <b>QT-stretch</b>     |                     |              |                     |              |
| <i>Lead group I</i>   | 27%                 | 0.07         | 73%                 | 0.58         |
| <i>Lead group II</i>  | 47%                 | 0.31         | 67%                 | 0.52         |
| <i>Lead group III</i> | 67%                 | 0.53         | 100%                | 1.00         |
| <i>Lead group IV</i>  | 33%                 | 0.13         | 87%                 | 0.80         |
| <b>Return</b>         |                     |              |                     |              |
| <i>Lead group I</i>   | 47%                 | 0.23         | 67%                 | 0.46         |
| <i>Lead group II</i>  | 67%                 | 0.53         | 80%                 | 0.71         |
| <i>Lead group III</i> | 60%                 | 0.20         | 87%                 | 0.75         |
| <i>Lead group IV</i>  | 73%                 | 0.54         | 93%                 | 0.89         |

**Supplementary Table S3.** Inter- and intra-reader validity for T-wave morphology expressed as Cohen's kappa statistic from a random sample of 10% that was measured by an additional reader (JP) and re-measured by the principal reader (SV).

Lead group I = II, III, aVF, Lead group II = V1-V3, Lead group III = V4-V6, Lead group IV = I and aVL.

|                                                  | Control<br>n=42 | LQTS<br>n=29    | Possible LQTS<br>n=10 | Other<br>n=3    | p-value          |
|--------------------------------------------------|-----------------|-----------------|-----------------------|-----------------|------------------|
| <b>Age, years</b>                                | 9 (7-14)        | 13 (10-15)      | 14 (11-17)            | 16 (14-16)      | 0.021            |
| <b>Girls</b>                                     | 18 (43%)        | 18 (62%)        | 6 (60%)               | 1 (33%)         | 0.357            |
| <b>Presentation</b>                              |                 |                 |                       |                 | <b>&lt;0.001</b> |
| Family screening                                 | 18 (43%)        | 25 (86%)        | 2 (20%)               | 0 ( 0%)         |                  |
| Family SCD                                       | 1 ( 2%)         | 0 ( 0%)         | 0 ( 0%)               | 0 ( 0%)         |                  |
| Near-drowning/OHCA/ACA                           | 1 ( 2%)         | 0 ( 0%)         | 2 (20%)               | 1 (33%)         |                  |
| Other                                            | 22 (52%)        | 4 (14%)         | 6 (60%)               | 2 (67%)         |                  |
| <b>Symptomatic at presentation</b>               | 1 ( 2%)         | 2 ( 9%)         | 2 (20%)               | 1 (33%)         | 0.046            |
| <b>BB-therapy</b>                                | 1 ( 2%)         | 6 (21%)         | 3 (30%)               | 0 ( 0%)         | 0.014            |
| <b>Supine position<math>\text{¥}</math></b>      |                 |                 |                       |                 |                  |
| HR <sub>baseline</sub> ,bpm                      | 78 ( $\pm$ 12)  | 69 ( $\pm$ 16)  | 72 ( $\pm$ 20)        | 59 ( $\pm$ 6)   | 0.030            |
| QT <sub>baseline</sub> ,ms                       | 356 ( $\pm$ 27) | 433( $\pm$ 56)  | 381 ( $\pm$ 57)       | 375 ( $\pm$ 30) | <b>&lt;0.001</b> |
| QTc <sub>baseline</sub> ,ms                      | 402 ( $\pm$ 28) | 455 ( $\pm$ 36) | 405 ( $\pm$ 27)       | 373 ( $\pm$ 49) | <b>&lt;0.001</b> |
| <b>Standing position<math>\text{¥}</math></b>    |                 |                 |                       |                 |                  |
| HR <sub>maxHR</sub> ,bpm                         | 115 ( $\pm$ 13) | 99 ( $\pm$ 15)  | 111( $\pm$ 23)        | 91 ( $\pm$ 4)   | <b>&lt;0.001</b> |
| QT <sub>maxHR</sub> ,ms                          | 347 ( $\pm$ 32) | 421 ( $\pm$ 56) | 381 ( $\pm$ 51)       | 373 ( $\pm$ 28) | <b>&lt;0.001</b> |
| QTc <sub>maxHR</sub> ,ms                         | 479 ( $\pm$ 34) | 536 ( $\pm$ 45) | 509 ( $\pm$ 50)       | 459 ( $\pm$ 28) | <b>&lt;0.001</b> |
| HR <sub>stretch</sub> ,bpm                       | 113 ( $\pm$ 14) | 97 ( $\pm$ 16)  | 109 ( $\pm$ 23)       | 90 ( $\pm$ 3)   | <b>&lt;0.001</b> |
| QT <sub>stretch</sub> ,ms                        | 355 ( $\pm$ 31) | 429 ( $\pm$ 57) | 395 ( $\pm$ 51)       | 372 ( $\pm$ 30) | <b>&lt;0.001</b> |
| QTc <sub>stretch</sub> ,ms                       | 486 ( $\pm$ 35) | 539 ( $\pm$ 43) | 526 ( $\pm$ 54)       | 456 ( $\pm$ 32) | <b>&lt;0.001</b> |
| QT <sub>return</sub> ,ms                         | 359 ( $\pm$ 33) | 432 ( $\pm$ 49) | 390 ( $\pm$ 49)       | 373 ( $\pm$ 29) | <b>&lt;0.001</b> |
| QTc <sub>return</sub> ,ms                        | 406 ( $\pm$ 44) | 454 ( $\pm$ 43) | 427 ( $\pm$ 41)       | 372 ( $\pm$ 47) | <b>&lt;0.001</b> |
| <b>Response to standing<math>\text{¥}</math></b> |                 |                 |                       |                 |                  |
| Time to maximal tachycardia,s                    | 11 (10-14)      | 12 (11-15)      | 11 (8-14)             | 8 (8-10)        | 0.445            |
| Time to maximal QT-stretching,s                  | 11 ( 9-13)      | 10 ( 9-13)      | 11 (9-13)             | 7 (7-10)        | 0.692            |
| Time to return to baseline,s                     | 26 (22-28)      | 24 (21-28)      | 25 (23-27)            | 20 (17-23)      | 0.624            |
| $\Delta$ HR during maximal tachycardia,bpm       | 38 ( $\pm$ 12)  | 30 ( $\pm$ 9)   | 39 ( $\pm$ 13)        | 32 ( $\pm$ 8)   | 0.031            |
| $\Delta$ QT during maximal tachycardia,ms        | -8 ( $\pm$ 23)  | -11 ( $\pm$ 26) | -1 ( $\pm$ 22)        | -2 ( $\pm$ 10)  | 0.616            |
| $\Delta$ QTc during maximal tachycardia,ms       | 77 ( $\pm$ 36)  | 80 ( $\pm$ 39)  | 104 ( $\pm$ 49)       | 86 ( $\pm$ 23)  | 0.254            |
| $\Delta$ HR during maximal QT-stretching,bpm     | 36 ( $\pm$ 12)  | 28 ( $\pm$ 9)   | 38 ( $\pm$ 13)        | 31 ( $\pm$ 7)   | 0.025            |
| $\Delta$ QT during maximal QT-stretching,ms      | -1 ( $\pm$ 17)  | -3 ( $\pm$ 25)  | 14 ( $\pm$ 26)        | -3 ( $\pm$ 8)   | 0.167            |
| $\Delta$ QTc during maximal QT-stretching,ms     | 83 ( $\pm$ 33)  | 83 ( $\pm$ 39)  | 120 ( $\pm$ 51)       | 82 ( $\pm$ 19)  | 0.042            |
| $\Delta$ QT upon return to baseline HR,ms        | 4 ( $\pm$ 17)   | 0 ( $\pm$ 25)   | 9 ( $\pm$ 22)         | -2 ( $\pm$ 6)   | 0.599            |
| $\Delta$ QTc upon return to baseline HR,ms       | 4 ( $\pm$ 30)   | -2 ( $\pm$ 34)  | 22 ( $\pm$ 31)        | -2 ( $\pm$ 12)  | 0.247            |

**Supplementary Table S4.** Baseline characteristics and automatic ECG-measurements. Differences between groups were tested using a  $\chi^2$ -test for categorical variables, and with a one-way ANOVA or Kruskal Wallis test for continuous variables as appropriate. For post-hoc analyses a Bonferroni correction was used in order to correct for multiple comparisons.  $\text{¥}$  p-values <0.002 are considered to be significant. HR=heart rate, QTc=QT-interval corrected for heart rate using Bazett's formula, bpm=beats per minute, (m)s=(milli)seconds.

|                                   | <i>Inter-method</i> |                        |
|-----------------------------------|---------------------|------------------------|
|                                   | <i>ICC (95% CI)</i> | <i>Mean (±95% LoA)</i> |
| <b>Supine position</b>            |                     |                        |
| <i>HR<sub>baseline</sub>, bpm</i> | 0.915 (0.872-0.944) | 3 (± 12)               |
| <i>QT<sub>baseline</sub>, ms</i>  | 0.898 (0.847-0.933) | 12 (± 50)              |
| <b>Standing position</b>          |                     |                        |
| <i>HR<sub>maxHR</sub>, bpm</i>    | 0.980 (0.969-0.987) | 1 (± 7)                |
| <i>QT<sub>maxHR</sub>, ms</i>     | 0.903 (0.854-0.936) | 9 (± 49)               |
| <i>HR<sub>stretch</sub>, bpm</i>  | 0.969 (0.953-0.980) | 0 (± 9)                |
| <i>QT<sub>stretch</sub>, ms</i>   | 0.873 (0.811-0.916) | 5 (± 58)               |
| <i>HR<sub>return</sub>, bpm</i>   | 0.845 (0.768-0.898) | 4 (± 17)               |
| <i>QT<sub>return</sub>, ms</i>    | 0.774 (0.667-0.850) | 20 (± 84)              |

**Supplementary Table S5.** Inter-method validity expressed as the intra-class correlation coefficient (ICC) for single measurements for continuous variables based on a two-way consistency model according to Cicchetti<sup>1</sup> and Fleiss<sup>2</sup>. Bland-Altman analyses<sup>3</sup> were then performed to assess bias and 95% limits of agreement (LoA).

HR=heart rate, QTc=QT-interval corrected for heart rate using Bazett's formula, bpm=beats per minute, ms=milliseconds, IC=confidence interval.

1. Cicchetti DV, Sparrow SA. Developing criteria for establishing interrater reliability of specific items: applications to assessment of adaptive behavior. *American journal of mental deficiency* Sep 1981;86:127-137.
2. Fleiss JL. *Statistical methods for rates and proportions*. New York, N.Y: John Wiley and Sons; 1981.
3. Bland JM, Altman DG. Comparing methods of measurement: why plotting difference against standard method is misleading. *Lancet* (London, England) Oct 21 1995;346:1085-1087.

**Supplementary Figures**



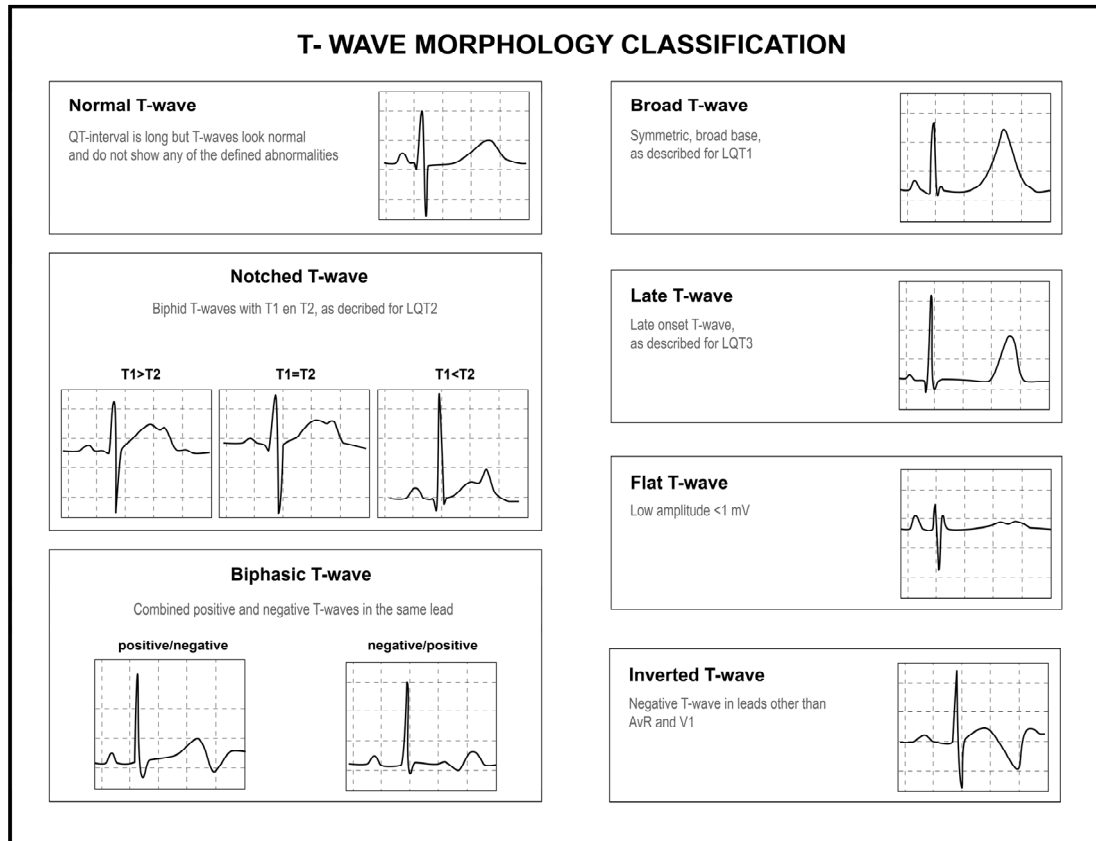

Supplementary Figure S1. T-wave morphology classification adapted from Chorin et al.<sup>14</sup>

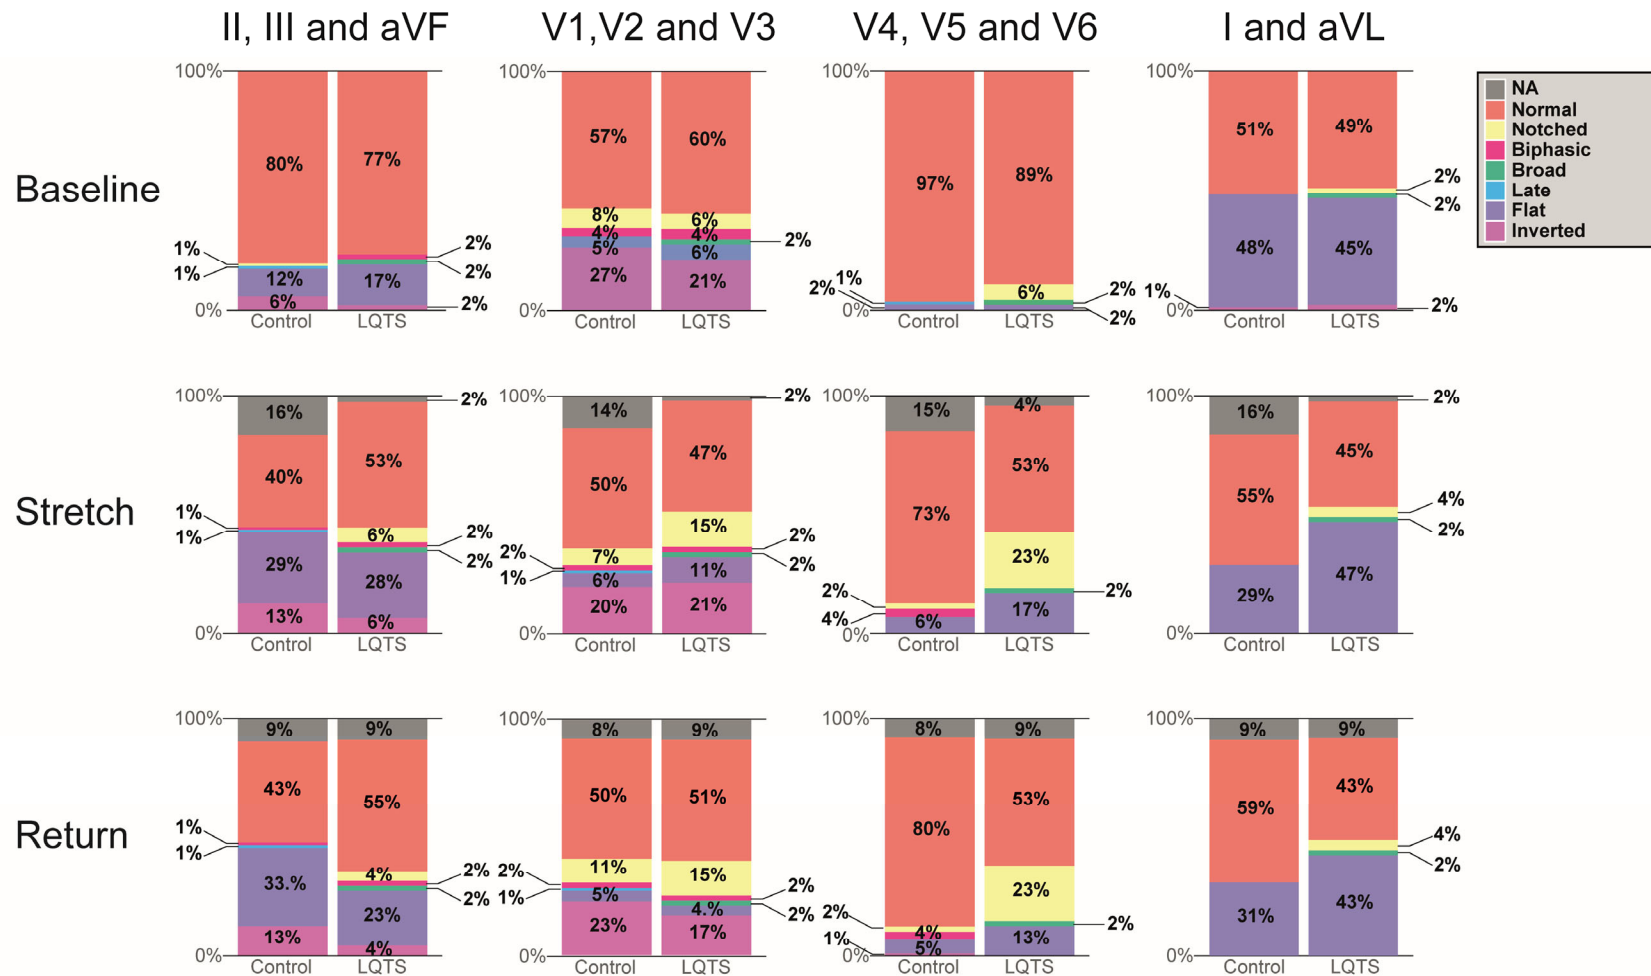

**Supplementary Figure S2.** Percentage of present T-wave morphologies at three phases of the standing-test (i.e. at baseline, during maximal QT-stretching, and return to baseline) in controls and LQTS-children for four different lead-groups.

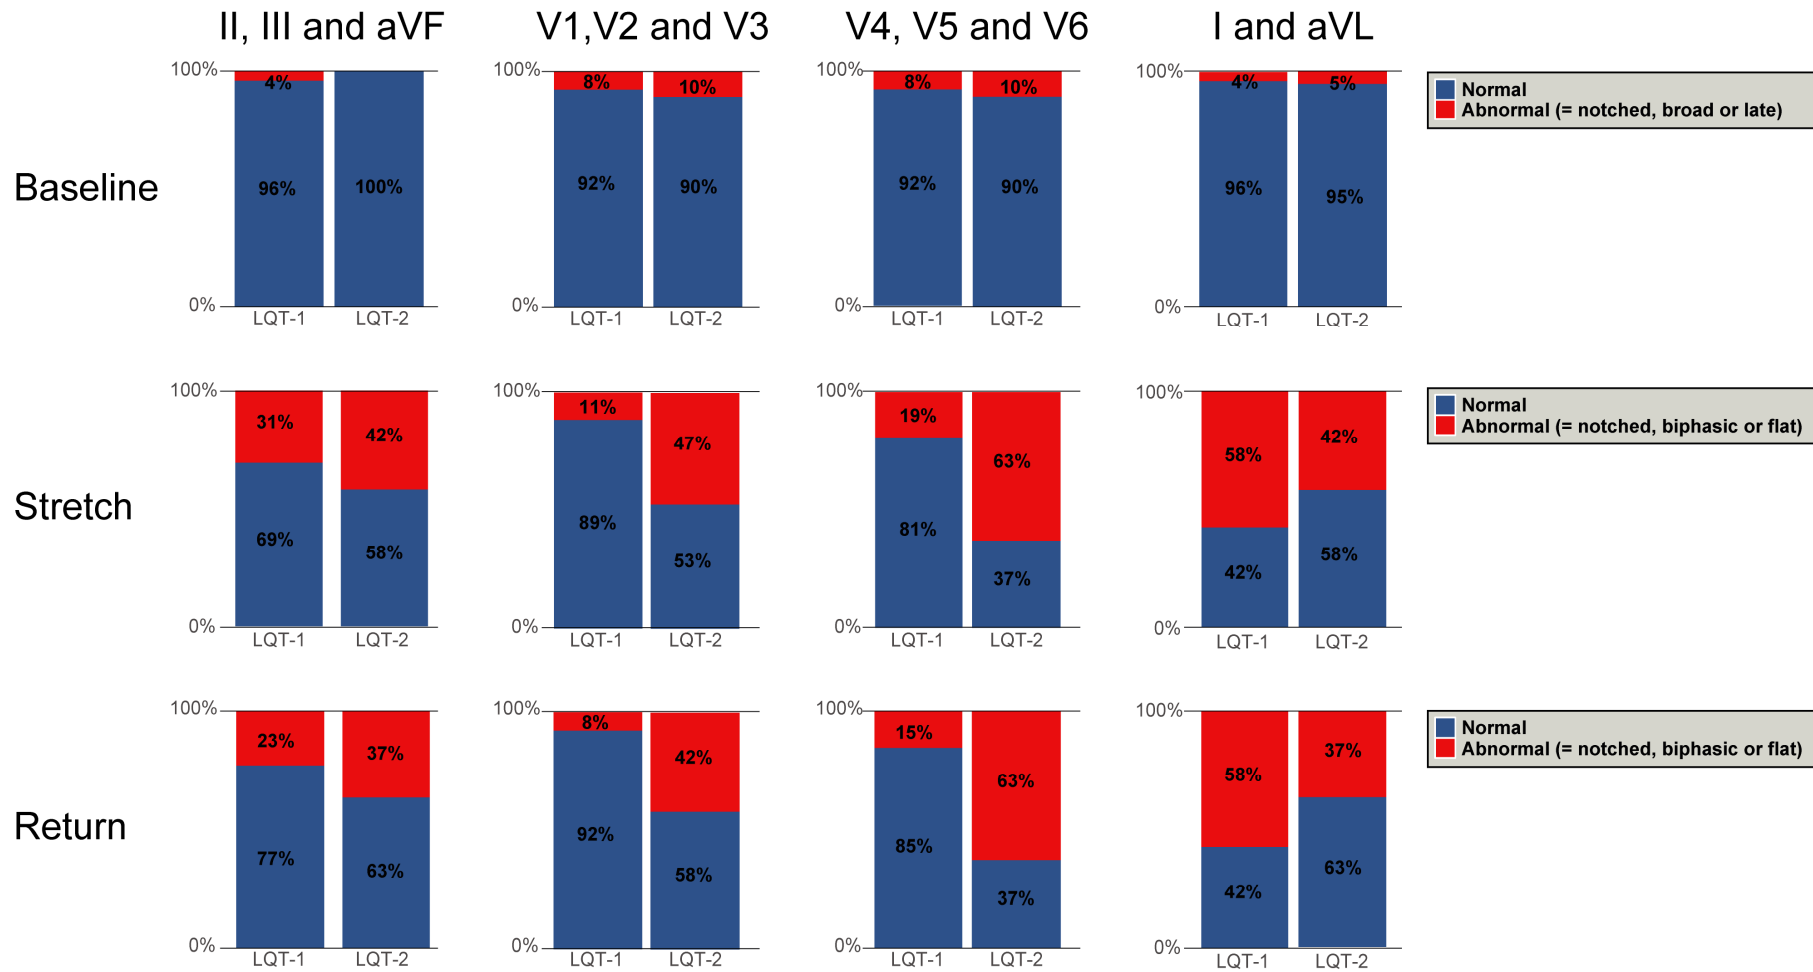

**Supplementary Figure S3.** Partition of T-waves at baseline and in response to standing into “normal” and “abnormal” response in LQTS-type-1 (LQT-1, n=26) and LQTS-type-2 (LQT-2, n=19). The two LQTS-type-3-patients are not shown.

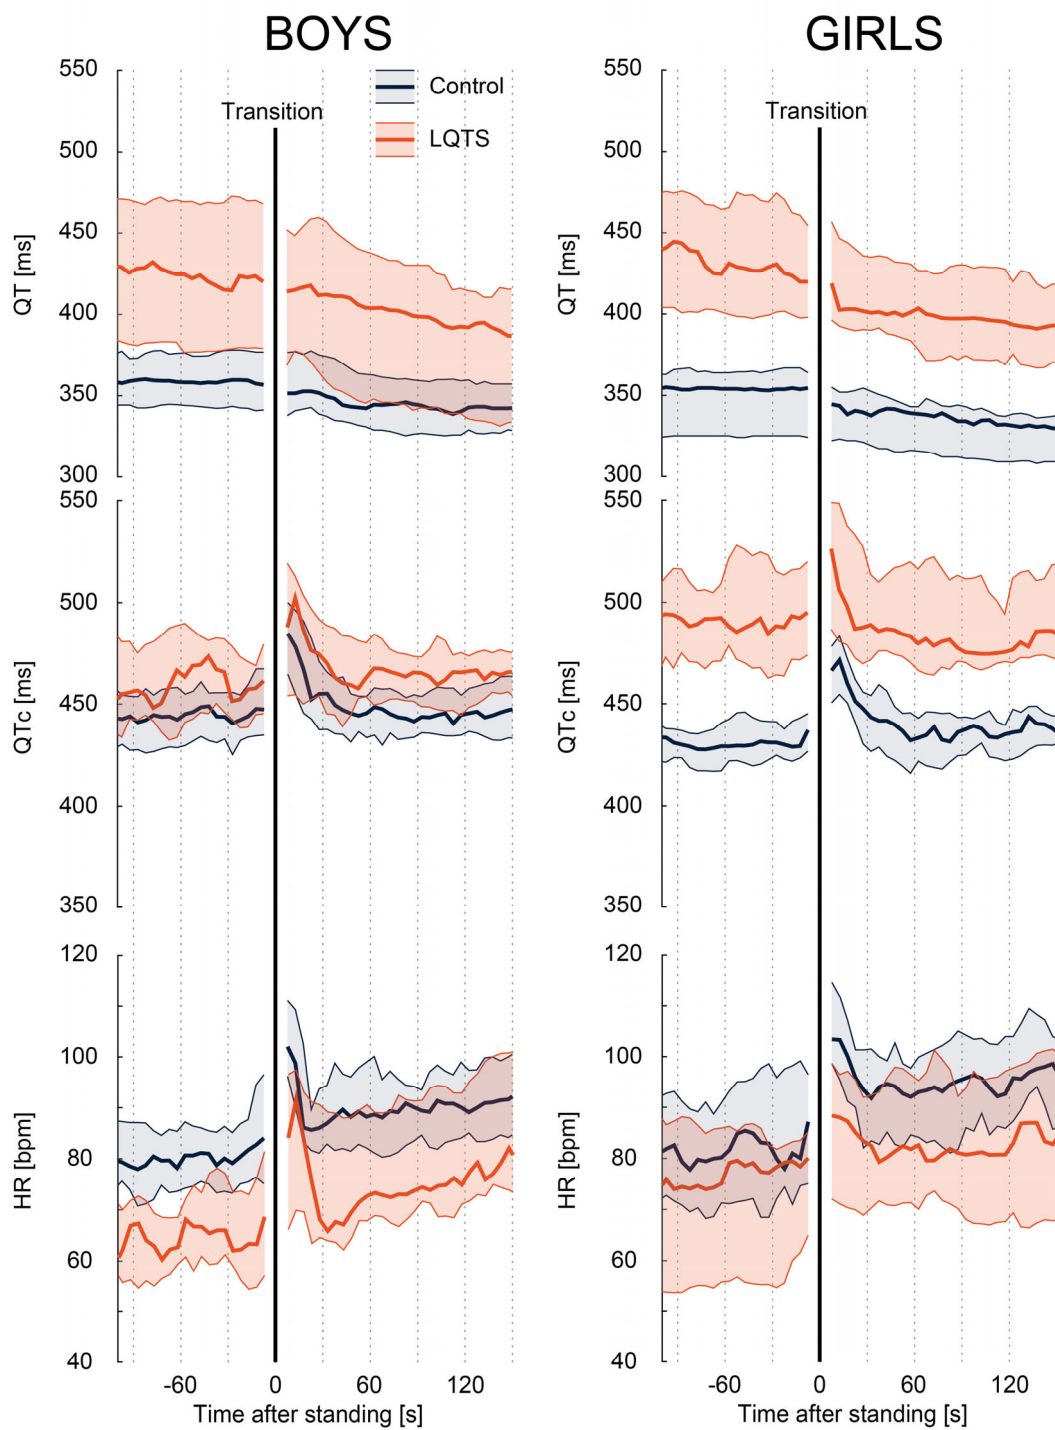

**Supplementary Figure S4.** Sex-difference in standing-test dynamics. Including 36 boys (25 controls and 11 LQTS-children) and 36 girls (18 controls and 18 LQTS-children). The median and interquartile range of the absolute QT-interval, QTc and heart rate of controls (blue) and LQTS-patients (orange), stratified for boys (**left column**) and girls (**right column**). Transition from supine to standing is indicated by the black solid line. HR=heart rate, LQTS=Long QT-syndrome, QTc=QT-interval corrected for heart rate using Bazett's formula.

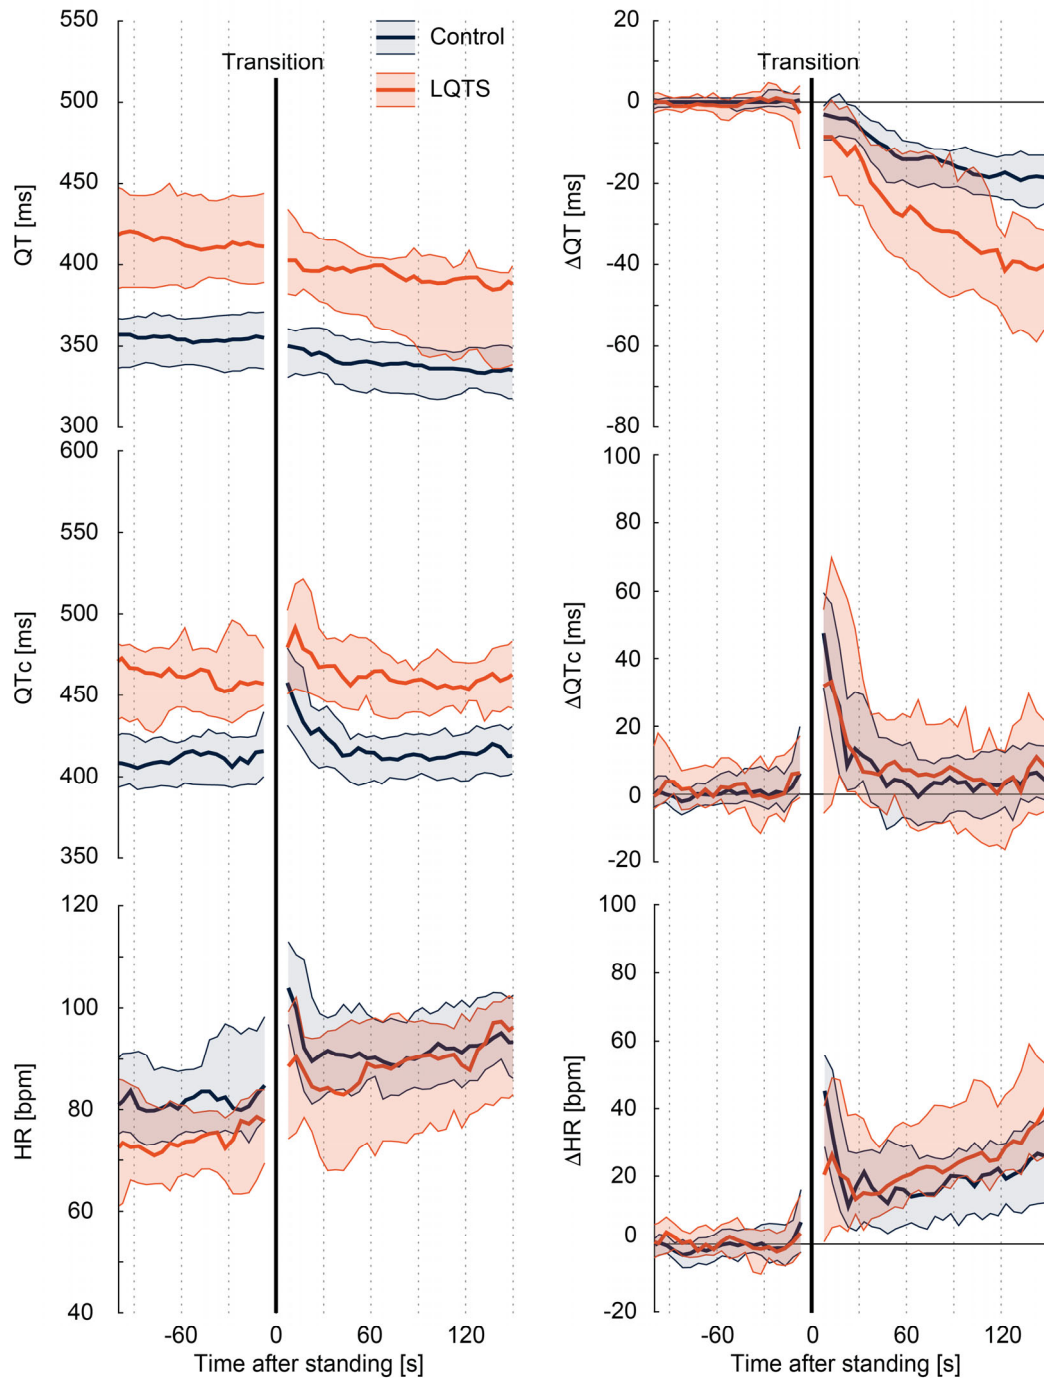

**Supplementary Figure S5.** Standing-test dynamics in controls (n=41) and LQTS-patients (n=21) without beta-blocker therapy. **Left:** median and interquartile range of the absolute QT-interval, QTc and heart rate of controls (blue) and LQTS-patients (orange). **Right:** relative change of the QT-interval, QTc and heart rate to the baseline values for controls and LQTS-patients. Transition from supine to standing is indicated by the black solid line. HR=heart rate, LQTS=Long QT-syndrome, QTc=QT-interval corrected for heart rate using Bazett's formula.

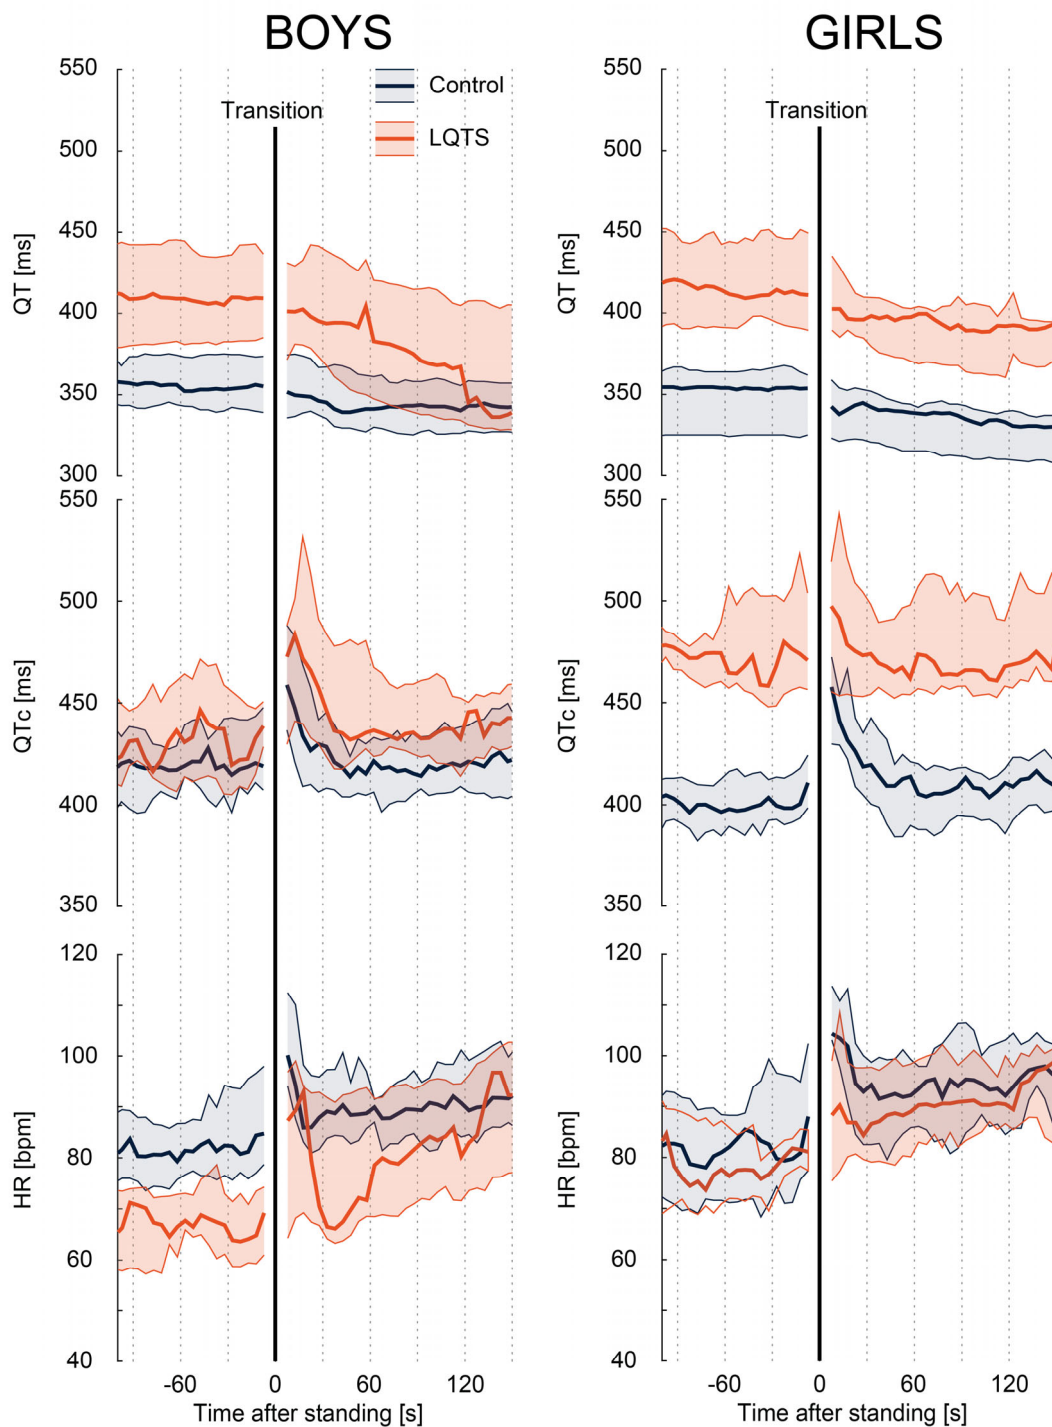

**Supplementary Figure S6.** Sex-difference in standing-test dynamics in controls and LQTS-patients without beta-blocker therapy. Including 31 boys (23 controls and 8 LQTS-patients) and 31 girls (18 controls and 13 LQTS-patients). The median and interquartile range of the absolute QT-interval, QTc and heart rate of controls (blue) and LQTS-patients (orange), stratified for boys (**left column**) and girls (**right column**). Transition from supine to standing is indicated by the black solid line. HR=heart rate, LQTS=Long QT-syndrome, QTc=QT-interval corrected for heart rate using Bazett's formula.

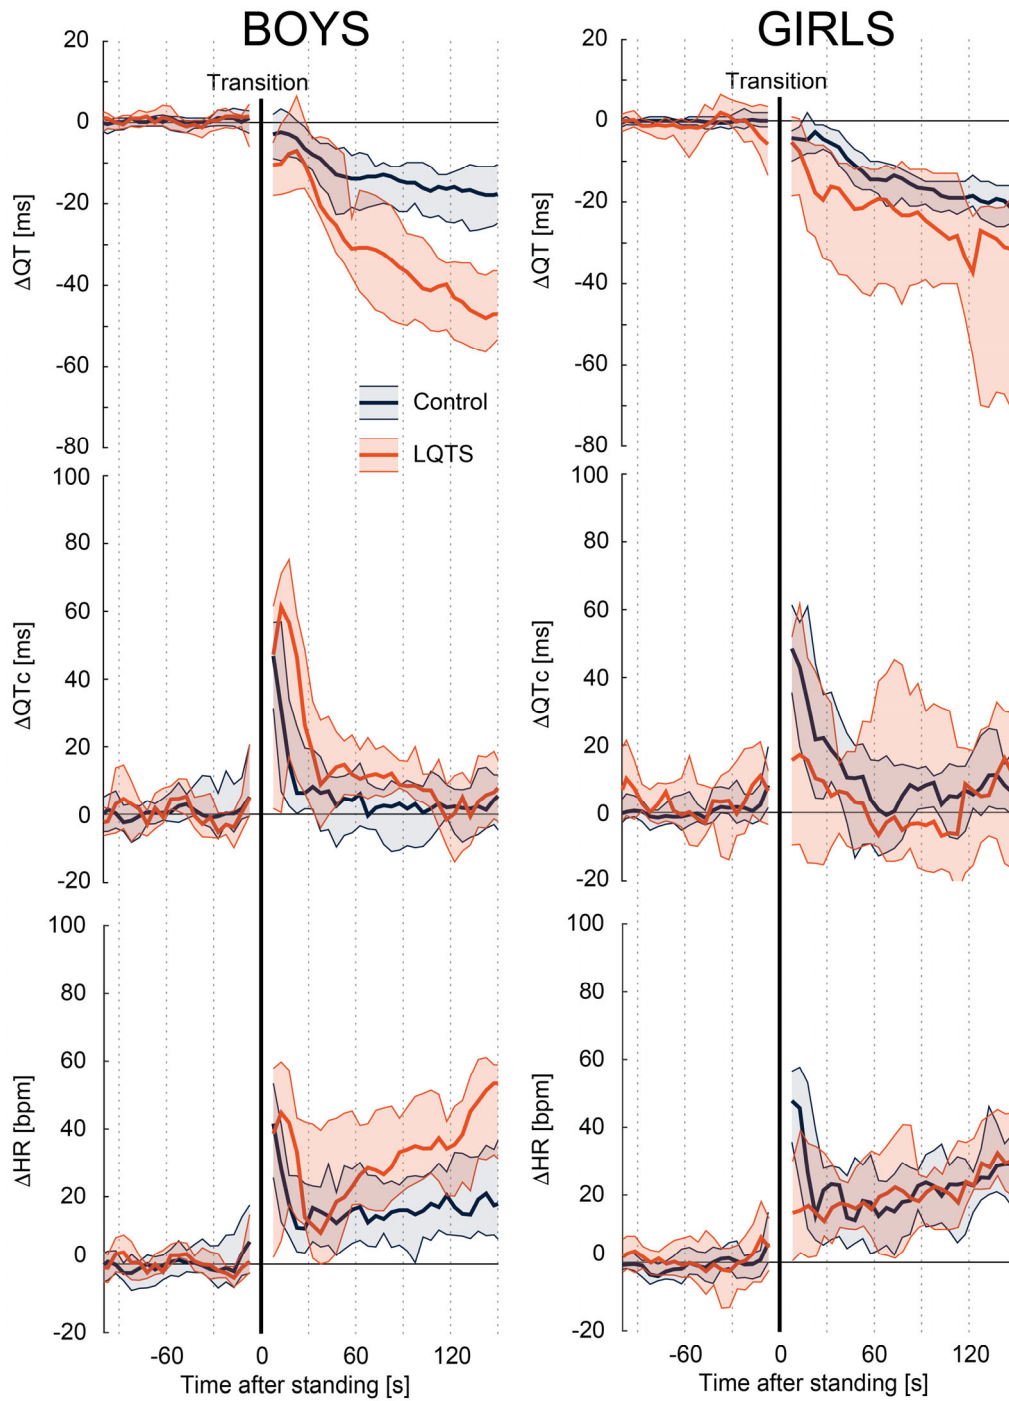

**Supplementary Figure S7.** Sex-difference in standing-test dynamics in controls and LQTS-patients without beta-blocker therapy. Including 31 boys (23 controls and 8 LQTS-patients) and 31 girls (18 controls and 13 LQTS-patients). The median and interquartile ranges of the relative change of the QT-interval, QTc and heart rate to the baseline for controls (blue) and LQTS-patients (orange), stratified for boys (**left column**) and girls (**right column**). Transition from supine to standing is indicated by the black solid line. HR=heart rate, LQTS=Long QT-syndrome, QTc=QT-interval corrected for heart rate using Bazett's formula.

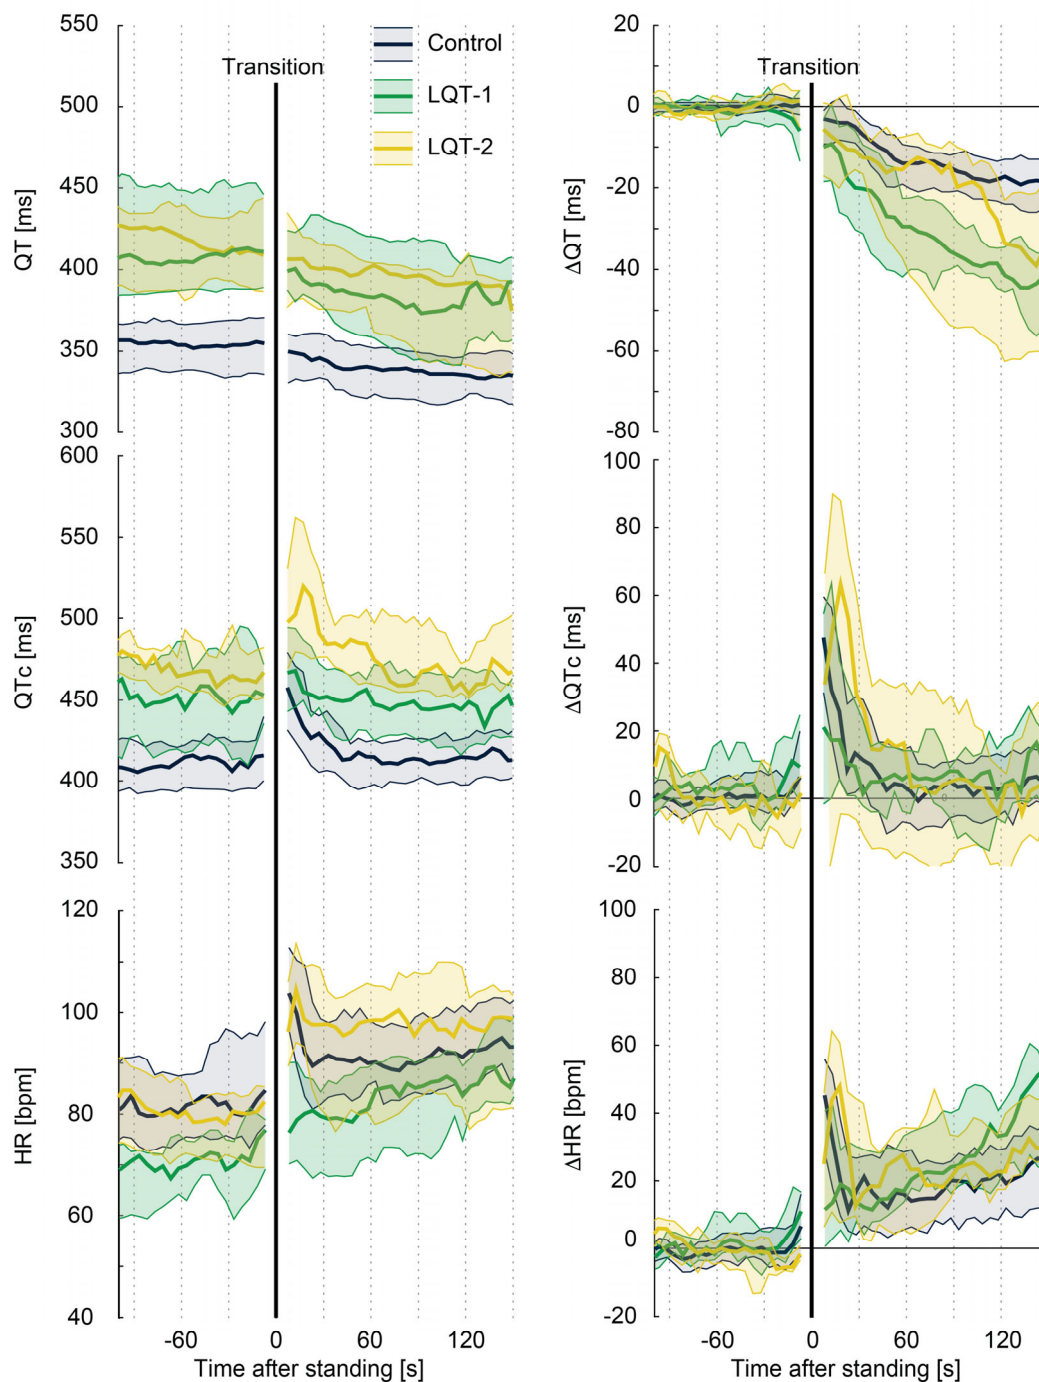

**Supplementary Figure S8.** Genotype-differences in standing-test dynamics in controls and LQTS-patients without beta-blocker therapy. Including 12 LQT-1 and 8 LQT-2 patients. **Left:** median and interquartile range of the absolute QT-interval, QTc and heart rate of controls (blue), LQT-1-patients (green) and LQT-2-patients (yellow). **Right:** relative change of the QT-interval, QTc and heart rate to the baseline values for controls and LQTS-patients. Transition from supine to standing is indicated by the black solid line. HR=heart rate, LQTS=Long QT-syndrome, QTc=QT-interval corrected for heart rate using Bazett's formula.
